# Supplementary material for: The importance of parameter resampling for soil moisture data assimilation into hydrologic models using the particle filter
Source: Copernicus journal article supplement (doi:10.5194/hess-16-375-2012), 2012-02-08
Supplement: Supplementary file 1 [file hess-16-375-2012-supplement.zip]

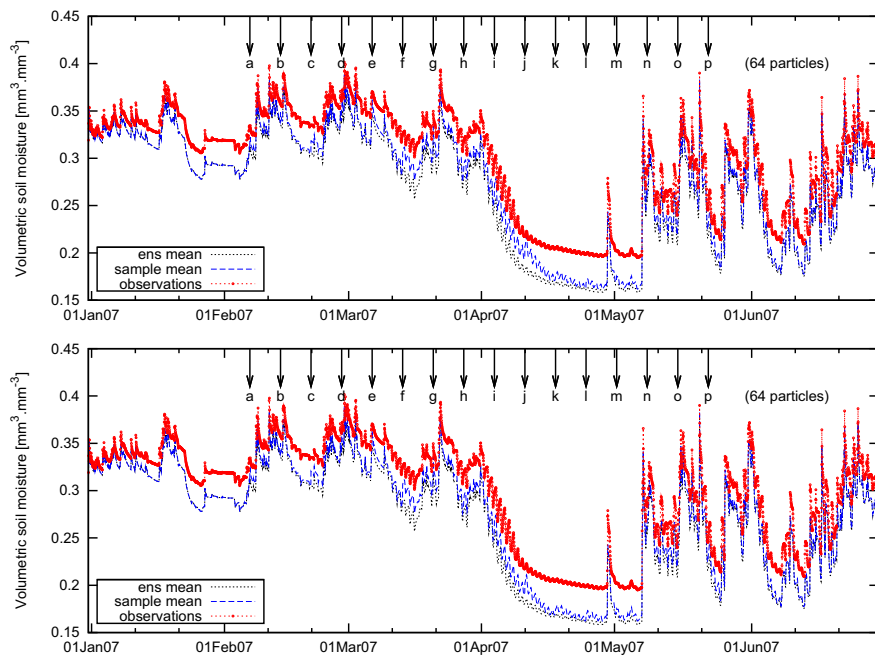

**Fig. 11.** Performance of the SIS filter with Stratified Resampling (top panel) and Residual resampling(bottom panel)
