# Supplementary material for: The importance of parameter resampling for soil moisture data assimilation into hydrologic models using the particle filter
Source: Copernicus journal article supplement (doi:10.5194/hess-16-375-2012), 2012-02-08
Supplement: Supplementary file 3 [file hess-16-375-2012-supplement.zip]

## Stratified Resampling

```
!=====
subroutine PF_StrResamp(wght_v,keep_v)
!-----
! Purpose: resamples the weights of the particles
! Method: stratified resampling
! Author:
! 02 oct 2009 : Douglas Plaza G.
!-----
use precision
use clm_varder
use clm_varctl , only : print_stat_out
use clm_varmap , only : begpatch, endpatch, numland
use clm_varpar , only : maxpatch_pft
implicit none
!----Arguments-----
real(r8), dimension(:), intent(inout) :: keep_v      !vector with particle survivals
real(r8), dimension(:), intent(inout) :: wght_v      !particle state vector
!----Local Variables-----
real(r8), dimension(maxpatch_pft) :: di,ind1,sel, W_cs
integer, dimension(maxpatch_pft) :: tmp_kpt
real(r8) :: kon
integer :: ctr, i, k, r, l
!----End Variable List-----
!--- variables initialization -----
kon = 0.0
di(:) = 0.0
ind1(:) = 0.0
sel(:) = 0.0
W_cs(:) = 0.0
!-----
di(1) = 1./(2*maxpatch_pft)!kon/2.
do i = 2,maxpatch_pft !+1 <== bus error (dimensions)
  di(i) = di(i-1)+ (1./maxpatch_pft)!kon
enddo
kon = 1./maxpatch_pft
call random_seed
call random_number(ind1)
sel = di + (ind1*kon - kon/2.)
W_cs(1) = wght_v(1)

do i=2,maxpatch_pft
  W_cs(i) = W_cs(i-1)+wght_v(i)
enddo
ctr = 1
do i = 1,maxpatch_pft
  do while ((ctr <= maxpatch_pft).and.(sel(ctr) < W_cs(i)))
    tmp_kpt(ctr) = i
    ctr = ctr+1
  enddo
enddo
keep_v = tmp_kpt
end subroutine PF_StrResamp
!=====
```

## Residual resampling

```
!=====
subroutine PF_ResResamp(wght_v,keep_v)
!-----
! Purpose: resamples the weights of the particles
! Method: residual resampling
! Author:
! 15 ago 2011 : Douglas Plaza G.
!-----
use precision
use clm_varder
use clm_varctl , only : print_stat_out
use clm_varmap , only : begpatch, endpatch, numland
use clm_varpar , only : maxpatch_pft
implicit none
!----Arguments-----
real(r8), dimension(:), intent(inout) :: keep_v !vector with particle survivals
real(r8), dimension(:), intent(inout) :: wght_v !importance weights
!----Local Variables-----
real(r8), dimension(maxpatch_pft) :: W_res, cumD
integer, dimension(maxpatch_pft) :: N_child, inInd, outInd
integer :: N_res, ii, inde, jj, c_flag, i
!---Allocatable variables-----
real(r8), dimension(:), allocatable :: N_rand, rand_out, u_out, temp_Uout
integer, dimension(:), allocatable :: N_res_v
!----End Variable List-----
!--- variables initialization -----
N_child(:) = 0
outInd(:) = 0
W_res(:) = 0.0
cumD(:) = 0.0
!-----
do i = 1,maxpatch_pft
  W_res(i) = maxpatch_pft*wght_v(i)
  N_child(i) = int(W_res(i))
enddo
N_res = maxpatch_pft - sum(N_child)
allocate (N_rand(N_res), rand_out(N_res), u_out(N_res), temp_Uout(N_res))
allocate (N_res_v(N_res))
c_flag = 1
do i = N_res,1,-1
  N_res_v(c_flag) = i
  c_flag = c_flag+1
enddo
if (N_res .ne. 0) then
  do i = 1,maxpatch_pft
    W_res(i) = (W_res(i)-N_child(i))/N_res
    if (i .eq. 1) then
      cumD(i) = W_res(1)
    else
      cumD(i) = cumD(i-1)+W_res(i)
    endif
  enddo
  call random_seed
  call random_number(N_rand)
  do i=1,N_res
```

```

    rand_out(i) = N_rand(i)**(1./N_res_v(i))
    if (i .eq. 1) then
        u_out(i) = rand_out(1)
    else
        u_out(i) = u_out(i-1)*rand_out(i)
    endif
enddo
temp_Uout = u_out
ii = N_res
do i=1,N_res
    u_out(i) = temp_Uout(ii)
    ii=ii-1
enddo
jj = 1
do i=1,N_res
    do while (u_out(i) .gt. cumD(jj))
        jj=jj+1
    enddo
    N_child(jj)=N_child(jj)+1
enddo
write(*,*)"The value of N_child is: "
write(*,*)(N_child(i),i=1,maxpatch_pft)
endif
do i=1,maxpatch_pft
    inInd(i) = i
enddo
inde = 1;
do i=1,maxpatch_pft
    if (N_child(i) .gt. 0) then
        do jj=inde,inde+N_child(i)-1
            outInd(jj) = inInd(i)
        enddo
    endif
    inde = inde+N_child(i)
enddo
write(*,*)"The value of outInd is: "
write(*,*)(outInd(i),i=1,maxpatch_pft)
keep_v = outInd
deallocate (N_rand, rand_out, u_out, temp_Uout)
deallocate (N_res_v)

```

```

end subroutine PF_ResResamp

```

```

!=====

```
