# Supplementary figures and images for: The importance of parameter resampling for soil moisture data assimilation into hydrologic models using the particle filter
Source: Copernicus journal article supplement (doi:10.5194/hess-16-375-2012), 2012-02-08

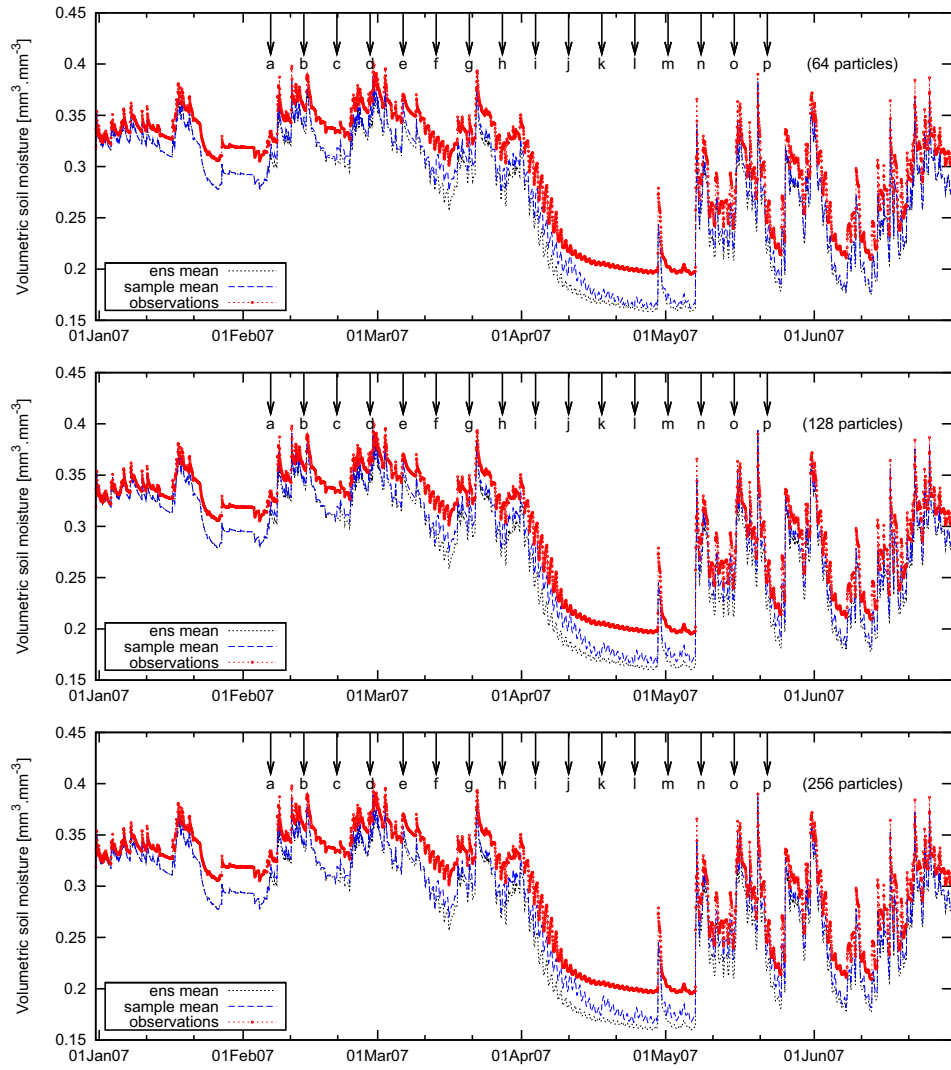

**Fig. 10.** Performance of the SISR-StraResamp filter concerning three different particle sizes

Supplement: Supplementary file 2 [file hess-16-375-2012-supplement.zip]
